# Supplementary material for: Melatonin Alleviates Chromium Toxicity in Maize by Modulation of Cell Wall Polysaccharides Biosynthesis, Glutathione Metabolism, and Antioxidant Capacity
Source: MDPI journal article supplement (doi:10.3390/ijms24043816), 2023-02-14
Supplement: s1 [file s1]

**Table S1.** Melatonin and Cr induced changes in genes transcripts involved in heavy metal transport

| Transcript_ID         | Annotation                 | R-Cr VS R-C | R-Cr+M VS R-Cr |
|-----------------------|----------------------------|-------------|----------------|
| <i>Zm00001d027884</i> | <i>heavy metal ATPase2</i> | 1.56        | -1.23          |
| <i>GRMZM2G029951</i>  | <i>heavy metal ATPase4</i> | 1.78        | -1.09          |
| <i>Zm00001d015829</i> | <i>heavy metal ATPase4</i> | 2.31        | -1.84          |

**Table S3.** Gene specific primers used in this study

| Primer name       | Transcript_ID or GenBank accession no. | Annotation                       | Forward                | Reverse                 |
|-------------------|----------------------------------------|----------------------------------|------------------------|-------------------------|
| <i>ZmUbi-2-RT</i> | NM_001329666.1                         | Polyubiquitin                    | TGGTTGTGGCTTCGTTGGTT   | GCTGCAGAAGAGTTTTGGGTACA |
| <i>ZmGAUT-RT</i>  | <i>Zm00001d009808</i>                  | <i>Galacturonsyl-transferase</i> | AGTTACTGCCTCTGGTCT     | CACTCTGCCTTGTATGGA      |
| <i>ZmPME-RT</i>   | <i>Zm00001d005465</i>                  | <i>Pectin methylesterase</i>     | GCAAGGACCTGCCCAAGAAC   | CGGATGCCTCGGTGATGAG     |
| <i>ZmSAT-RT</i>   | <i>Zm00001d038737</i>                  | <i>Serine acetyltransferase</i>  | AGTCGGAGGACGACGAGACC   | GAGGAGGCAGTGGGAGAAGC    |
| <i>ZmGST-RT</i>   | <i>Zm00001d010870</i>                  | <i>Glutathione S-transferase</i> | GACCTCACGCTCTTTGAATCCC | GCGAAGCACTCCACCACGAT    |
| <i>ZmSOD-RT</i>   | <i>Zm00001d029170</i>                  | <i>Superoxide dismutase</i>      | GGTGAAGGCTGTTGCTGT     | CTCTGCCAATGATTGAGTTT    |
| <i>ZmAPX-RT</i>   | <i>Zm00001d023582</i>                  | <i>Ascorbate peroxidase</i>      | CAAGAACATTACCGAGTGG    | CTGGCAAGCTGAAACAGA      |
| <i>ZmNR-RT</i>    | <i>Zm00001d031494</i>                  | <i>Ascorbate peroxidase</i>      | TTTTCTGATTCCCTCGTGTT   | TCTACTCTTCCTAGCCTTACTG  |
| <i>ZmTDC-RT</i>   | <i>Zm00001d024664</i>                  | <i>Tryptophan decarboxylase</i>  | TTCTTCCCGTCCACCAACAG   | GGAGACAAGCGTGACGAGCAT   |

## Maize experiment

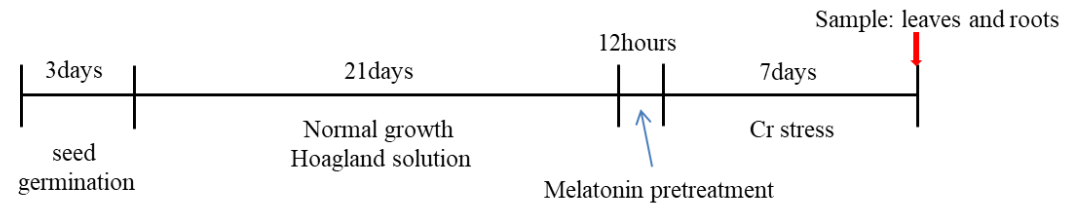

## *Arabidopsis thaliana* experiment

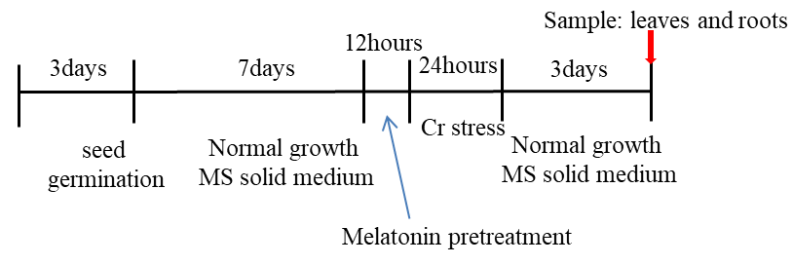

**Figure. S1** The scheme of the experiment
